1 **Balancing the Local and the Universal in Maintaining Ethical Access to a Genomics**

2 **Biobank**

3 Catherine Heeney<sup>1</sup> and Shona M. Kerr<sup>2</sup>

4

5 <sup>1</sup>Science, Technology and Innovation Studies, University of Edinburgh, High School Yards,  
6 Edinburgh EH1 1LZ, Scotland, UK

7 <sup>2</sup>MRC Human Genetics Unit, Institute of Genetics and Molecular Medicine, University of  
8 Edinburgh, Western General Hospital, Crewe Road South, Edinburgh EH4 2XU, Scotland,  
9 UK

10

11 Cate Heeney<sup>§</sup> [Catherine.Heeney@ed.ac.uk](mailto:Catherine.Heeney@ed.ac.uk)

12 Shona M. Kerr [Shona.Kerr@igmm.ed.ac.uk](mailto:Shona.Kerr@igmm.ed.ac.uk)

13 <sup>§</sup>Corresponding author

14

15 Correspondence to:

16 Dr Cate Heeney

17 Science, Technology and Innovation Studies

18 University of Edinburgh

19 High School Yards

20 Edinburgh

21 EH1 1LZ

22 Scotland, UK

23 Phone +44(0)131 650 6388

24 Fax +44(0)131 650 6399

25 Email [Catherine.Heeney@ed.ac.uk](mailto:Catherine.Heeney@ed.ac.uk)

26 **Abstract**

27 **Background**

28 Issues of balancing data accessibility with ethical considerations and governance of a  
29 genomics research biobank, Generation Scotland, are explored within the evolving policy  
30 landscape of the past ten years. During this time data sharing and open data access have  
31 become increasingly important topics in biomedical research. Decisions around data access  
32 are influenced by local arrangements for governance and practices such as linkage to health  
33 records, and the global through policies for biobanking and the sharing of data with large-  
34 scale biomedical research data resources and consortia.

35 **Methods**

36 We use a literature review of policy relevant documents which apply to the conduct of  
37 biobanks in two areas: support for open access and the protection of data subjects and  
38 researchers managing a bioresource. We present examples of decision making within a  
39 biobank based upon observations of the Generation Scotland Access Committee. We reflect  
40 upon how the drive towards open access raises ethical dilemmas for established  
41 biorepositories containing data and samples from human subjects.

42 **Results**

43 Despite much discussion in science policy literature about standardisation, the contextual  
44 aspects of biobanking are often overlooked. Using our engagement with GS we demonstrate  
45 the importance of local arrangements in the creation of a responsive ethical approach to  
46 biorepository governance. We argue that governance decisions regarding access to the  
47 biobank are intertwined with considerations about maintenance and viability at the local  
48 level. We show that in addition to the focus upon ever more universal and standardised  
49 practices, the local expertise gained in the management of such repositories must be  
50 supported.

## 51 **Conclusions**

52 A commitment to open access in genomics research has found almost universal backing in  
53 science and health policy circles, but repositories of data and samples from human subjects  
54 may have to operate under managed access, to protect privacy, align with participant consent  
55 and ensure that the resource can be managed in a sustainable way. Data access committees  
56 need to be reflexive and flexible, to cope with changing technology and opportunities and  
57 threats from the wider data sharing environment. To understand these interactions also  
58 involves nurturing what is particular about the biobank in its local context.

59

## 60 **Key Words**

61 Data Access; Informed Consent; Biobank; Research Ethics; Genomics

62

## 63 **Abbreviations**

64 Community Health Index (CHI)

65 Electronic Health (eHealth)

66 European Genome-phenome Archive (EGA)

67 Expert Advisory Group on Data Access (EAGDA)

68 General Practitioner (GP)

69 Generation Scotland Access Committee (GSAC)

70 Generation Scotland: Scottish Family Health Study (GS:SFHS)

71 Global Alliance for Genomics and Health (GA4GH)

72 Medical Research Council (MRC)

73 National Health Service (NHS)

74 Participant Information Leaflet (PIL)

75 Research Councils UK (RCUK)

## 76 **Background**

77 The scientific benefits of data sharing and the rights of research subjects are often balanced  
78 against open access to biomedical data [1, 2]. Here, we follow an established tradition of  
79 including empirical worked examples, when engaging with ethical issues raised by providing  
80 access to data stored within an existing biobank [3],[4],[5]. This has the aim of going beyond  
81 a simple opposition between being open and protection of the autonomy and privacy of data  
82 subjects to make a case for the inclusion of social and technical considerations in assessing  
83 what is ethical. We seek to address a gap in discussion in scientific, law and policy arenas  
84 about standardisation [6],[7] by focusing on the contextual aspects of biobanking, which  
85 include the will and ability to sustain the resource [8]. We will consider Generation Scotland  
86 (GS) [9] as one context in which the global policy agenda of open access meets local issues,  
87 which include not only ethics and governance but also questions of sustainability. GS is a  
88 genomics research biobank initiated with a Scottish Higher Education Funding Council grant  
89 between 2001 and 2004 and supported by the Chief Scientist Office of the Scottish  
90 Government from 2005 to 2014 ([www.generationscotland.org](http://www.generationscotland.org)). Participant recruitment and  
91 collection of data from the 24,000 plus participants began in 2006 and a GS infrastructure  
92 continues to exist and manage access to a repository more than a decade later. At the time of  
93 its creation Generation Scotland was described as: a “large, family-based intensively-  
94 phenotyped cohort recruited from the general population across Scotland, as a resource for  
95 studying the genetics of health areas of current and projected public health importance” [10].  
96 The period of the early 2000s saw genetic biobanks and repositories of various sorts created  
97 with the aim of ensuring a greater openness to data sharing. Generally, biobanks or  
98 repositories hold both genetic data and phenotypic data sourced from research clinics and  
99 often also eHealth records. UK Biobank and Generation Scotland were intended to be  
100 resources with minimal restrictions to reuse [8]. Data and sample repositories such as GS

101 were a manifestation of a growing commitment coming from science policy actors, including  
102 funders, to promote data sharing and access to a wide range of users. In what follows, we  
103 consider the specific characteristics of the GS repository in shaping its data access practices  
104 in light of the UK data sharing policy environment.

## 105 **Methods**

106 We engage with GS as a specific example of a biobank and our “encounters with experience”  
107 [4] gained within the Generation Scotland Access Committee (GSAC). Empirical studies of  
108 the perspectives of those running biobanks point to the need to consider the contextual  
109 aspects of biobanking [11],[12],[13]. We hope to further elucidate these contextual aspects by  
110 focusing on the work of the GSAC. The authors have both had experience of working within  
111 the GSAC. Using GS as a case enables us to consider how a particular repository attempts to  
112 balance locally established governance and institutional and research relationships with the  
113 imperative to share data as openly as possible. Through GS we explore the entwined  
114 practical and ethical challenges around data sharing for existing repositories [14]. By  
115 situating the ethics of access via examples arising in an active biobank, the aim is to ensure  
116 that our discussion goes beyond considerations of the “what if” type, which for example  
117 balance future health benefits against potential privacy risk questions for an imagined future  
118 [15].

119 We reflect upon the processes within GS through which requests for data access are handled.  
120 This will include considering how the Access Committee must deal creatively and  
121 responsively with issues not foreseen when the repository was first set up and as a  
122 consequence, which may challenge existing governance arrangements [16]. Therefore, we  
123 present examples of the decision-making process of the GSAC in order to consider how  
124 changes in the global data sharing and governance environment, as well as internal changes  
125 to the resource, raise ethical questions. It is in the context of the GSAC that the wider policy

126 field, which promotes open sharing, is negotiated in relation to the characteristics of GS.  
127 Developments within the biobank and the data sharing environment more generally can raise  
128 ethical dilemmas even if the consent obtained was comparatively broad. ‘While in an  
129 unproblematised situation, material objects are seamlessly woven into every day practice -  
130 family pedigrees are produced, blood samples are taken, medical records are filed away etc.  
131 In some cases the movement of these material objects into different physical locations, or  
132 even the particularity of their arrangement or configuration, can serve to problematize those  
133 practices’ [17]. We argue that data sharing raises issues relating to the role of the repository  
134 in future governance and ethical oversight and how expectations and preferences of  
135 participants will be interpreted in future scenarios, for example within consortia [18]. Whilst  
136 issues of sustainability could be viewed as separate from ethical and governance  
137 considerations, we aim to show that they are inseparable in relation to access [19].

## 138 **Results**

### 139 **Generation Scotland (GS)**

140 The GS Scottish Family Health Study was designed to provide a research resource,  
141 adequately powered to detect moderate sized genetic effects upon common and chronic  
142 disease and traits. A family-based recruitment strategy was employed to collect over 24,000  
143 participants between 2006 and 2011. Study participants were first approached through their  
144 General Practitioner (GP) using the Community Health Index (CHI) number (the CHI  
145 number exists only in Scotland and is unique to each individual in the >96% of the Scottish  
146 population registered with a GP) [20]. Those who indicated that they and one or more of their  
147 relatives would participate were sent an information leaflet, a consent form and a preclinical  
148 questionnaire. Subsequently, comprehensive information was collected covering  
149 demographics, biometric measurements and the health of individuals and their families,  
150 including psychological health. This was done via a paper questionnaire which gathered ~400

151 data items, and during a research clinic appointment a further ~150 items of data were  
152 collected. The membership of the GSAC includes representation from NHS Research and  
153 Development Offices, University Technology Transfer Offices, clinical academics, scholars  
154 working on ethics and governance, and laboratory and IT experts. The membership is  
155 renewed over time but individuals connected with the research design, recruitment and  
156 maintenance have ongoing input. A dedicated management group responsible for  
157 implementing the access arrangements was funded by the Chief Scientist Office (CSO) of the  
158 Scottish Government, for an initial period of three years, following the completion of  
159 recruitment (the management structure of GS is illustrated in Figure 1). Currently, members  
160 of the GS Executive Committee, Expert Working Groups and Access Committee give their  
161 time freely as part of their academic or support staff duties.

162 The Management, Access and Publication Policy of GS specifies that the Access Committee  
163 (GSAC) will: manage requests for collaboration and use of Project Data, Derived Data and  
164 NHS Data and/or Samples; Approve or deny requests for new collaborations; Consider and  
165 approve: Collaboration Proposal Forms and Data and Material Transfer Agreements and  
166 Report to the Executive on the progress of proposed collaborations. It must also consider the  
167 terms of consent and protection of confidentiality of data subjects [9]. GSAC meetings are  
168 held approximately quarterly depending on the volume and complexity of the proposals. The  
169 GSAC considers a range of criteria when reviewing data access requests, as is standard  
170 practice for Data Access Committees operating a managed (controlled) access process  
171 [21],[22]. Pre-screening by the GS Management Group ensures that full reviews take place  
172 only after funding has been obtained by the applicants and if requested resources match GS  
173 holdings. Requests which are considered routine are dealt with via email without detailed  
174 discussion by the GSAC. Routine requests seek to access data only, do not require the  
175 participants to be re-contacted and are viewed as raising no significant governance issues.

176 Examples include the re-analysis of existing anonymised genomic datasets to test and  
177 improve software algorithms, or to access anonymised individual patient data according to a  
178 particular genotype of interest and to generate preliminary data for a grant application.  
179 Furthermore, GSAC is notified but is not directly involved in decisions to approve release of  
180 GS data and/or samples for management rather than research purposes to the GS management  
181 team or to academic researchers from institutions that are part of the GS Collaboration  
182 Agreement. Approximately 20 projects have required this type of release, which are not  
183 subject to Data and Material Transfer Agreement signature or an access charge. The primary  
184 purpose of these management access requests is to test or check the quality of an aspect of the  
185 resource. In contrast, payment must be made for all research requests, as it was decided by  
186 the GS Executive Committee that no distinction would be made between researchers who had  
187 been involved in the GS Collaboration Agreement and those who had not.

#### 188 **Policy, access and repositories in the UK**

189 Public sector and charitable genomics and medical research funders such as the Wellcome  
190 Trust have long advocated data sharing and open access [8]. Here the collective benefits of  
191 data sharing are often positioned as in counter-balance or even opposed to more individual  
192 goods such as privacy and professional protectionism [23]. In 2003 the Wellcome Trust  
193 published an influential report, following a closed meeting in Fort Lauderdale, Florida,  
194 intended to identify and resolve issues that may form barriers to data sharing and reuse of  
195 existing biomedical data [24]. This generates tensions between notions of public and societal  
196 benefit from open access to large and complex biomedical datasets and the need to manage  
197 access with respect to the details of participant consent and privacy expectations [25],[26].  
198 Furthermore, it raises questions about adequate acknowledgement of those involved in  
199 maintaining the study [8]. At the Fort Lauderdale meeting , a model of access was promoted  
200 in which any studies with biomedical research value could become “community resources”



201 [24] in opposition to what were presented as restrictive and proprietorial governance models.  
202 The governance response for extending access has often been upon altering models of  
203 consent [27],[28]. Existing resources such as the Avon Longitudinal Study of Parents and  
204 Children and the 1958 British Birth Cohort were encouraged to revisit their participant  
205 consent [29]. Newer large scale repositories such as Generation Scotland and UK Biobank,  
206 created to support research access by secondary users [27], attempted to begin with broad  
207 informed consent to facilitate more flexible data access arrangements.

208 The policy environment for data sharing continues to abound with examples of  
209 encouragement to share. For example, data deposition to repositories such as the European  
210 Genome-phenome Archive (EGA) [30], a service for permanent archiving and sharing of all  
211 types of personally identifiable genetic and phenotypic data resulting from biomedical  
212 research projects, is included as a condition of publication for many key scientific journals.  
213 However, access to resources remains frustratingly difficult for some, prompting suggestions  
214 that access arrangements for biobanks tread a fine line between facilitating and hindering  
215 sharing [31]. A decade on from Fort Lauderdale the Wellcome Trust, with the Expert  
216 Advisory Group on Data Access (EAGDA), has produced a report addressing incentives and  
217 disincentives to sharing for funders, institutions and researchers [32]. Whilst acknowledging  
218 the ethical restrictions raised by confidentiality concerns for study participant data, the  
219 EAGDA report emphasises the importance of recognising the benefits of data sharing,  
220 including avoiding duplication of effort and allowing innovative and inventive uses of data  
221 already collected [32]. A Concordat produced by RCUK [33], which is an umbrella  
222 organization for the main public sector research funding bodies in the UK, echoed the  
223 benefits of data sharing, linking it to the advancement of scientific knowledge and  
224 safeguarding against misconduct. However, the RCUK Concordat does not deal exclusively  
225 with data arising from human subjects, and is thus largely silent on the matter of informed

226 consent and the management of ongoing relationships with research participants. Principle 5  
227 of the Concordat deals with the need for some elements of managed access. Justified  
228 restrictions to data access include the protection of commercial interests and the privacy and  
229 confidentiality of research subjects. However, the onus is placed on those controlling data  
230 sharing to make the case for withholding data [33]. A joint review of data security, consent  
231 and opt-outs in the UK National Health Service (NHS) and Care Quality Commission in 2016  
232 saw Dame Fiona Caldicott, the National Data Guardian, re-emphasise the responsibility of  
233 organisations using NHS data to ensure both anonymity and consent [34]. Yet there is an  
234 increasingly warm view of sharing health related data in the 2012 Caldicott report [35],  
235 where a seventh principle added to the list of six produced in 1997 states that sharing patient  
236 data could be viewed as equally important as the protection of patient confidentiality. Indeed,  
237 access to NHS data has been promoted to meet both healthcare and commercial interests [35].  
238 The EAGDA suggests that consent ‘is not a panacea and even where consent specifically  
239 allows for further data use, robust governance is essential for the ethical conduct of research’  
240 [32]. However, the report devotes considerably more time to ensuring that governance and  
241 other institutional arrangements promote data sharing where possible. This report does then  
242 engage with issues which may arise in particular contexts but opts to list a generic set of  
243 challenges, largely focused on concerns around protecting the privacy of individuals.  
244 The uniqueness of the genome of an individual coupled with even minimal phenotypic trait  
245 information are widely accepted to pose risks to data confidentiality and by extension the  
246 privacy of individual data subjects [26],[36]. Failure to take account of this problem led to  
247 access policy changes following controversy around the publication of a key paper in 2008  
248 [37], which highlighted the possibility of re-identifying an individual within an anonymized  
249 dataset [38]. Confidentiality and security arrangements and use restrictions are intended to  
250 mitigate against such incidents, which are thought may have the indirect effect of

251 undermining trust in a particular repository, or in biomedical research as a whole [26]. This  
252 perhaps explains a focus in policy documents upon balancing privacy related issues against  
253 the benefits of open access. The EAGDA has acknowledged the difficulties of maintaining  
254 promises of anonymity, suggesting that misuse including attempts at identification of  
255 individual data subjects will potentially incur both legal and funding sanctions [32].  
256 Meanwhile, those who are convinced of the benefits of open access tend to frame privacy  
257 concerns as a barrier to research. Therefore, privacy and related issues such as confidentiality  
258 and anonymity have themselves become a target for some, with the suggestion that actual  
259 harms arising, even where some breach is possible, are exaggerated [39].  
260 The UK policy environment reflects an international effort to take practical steps to ensure  
261 existing data is shared by improving the discoverability of biobanks, such as the UK MRC  
262 Cohort Directory ([https://www.mrc.ac.uk/research/facilities-and-resources-for-](https://www.mrc.ac.uk/research/facilities-and-resources-for-researchers/cohort-directory/)  
263 [researchers/cohort-directory/](https://www.mrc.ac.uk/research/facilities-and-resources-for-researchers/cohort-directory/)) and the UK CRC Tissue Directory  
264 (<https://www.biobankinguk.org/>). The latter is part of an umbrella organization for  
265 biobanking in Europe, BBMRI-ERIC (Biobanking and Biomolecular Resources Research  
266 Infrastructure), funded by the European Commission [40]. GS is listed in these directories  
267 and also tries to make its resources findable through the established academic routes of a  
268 study website and research publications as well as exploiting social media channels.  
269 Recently, an international initiative for scholarly data publishing proposed that all scientific  
270 data should be "FAIR"- Findable, Accessible, Interoperable, and Reusable [41]. The Global  
271 Alliance for Genomics and Health (GA4GH) has developed a Framework for responsible  
272 sharing of genomic and health-related data [42]. Here the push is towards creating the  
273 conditions of more open sharing via harmonisation: "The Global Alliance is working to alter  
274 the current reality where data are kept and studied in silos, and tools and methods are non-  
275 standardized and incompatible" (<http://genomicsandhealth.org/>). The hope is that a more

276 standardised approach to “tools and methods” used for collection, storage and  
277 characterisation of data will engender further improvements in the ease of data sharing.

278 **GS: where open access imperatives and local infrastructure meet**

279 Whilst the emphasis coming from the wider science and data sharing policy environment  
280 encourages the prioritisation of data sharing [43], translating this into practice remains a local  
281 enterprise. Requirements for managing access to resources held in biobanks and  
282 biorepositories is inevitably interpreted at the level of projects, repositories or institutions  
283 [31]. The entwined discourse of standardisation and open access would suggest that such  
284 heterogeneity is detrimental. However, scholarship in the field of science and technology  
285 studies suggests that despite efforts at standardization, practice will necessarily maintain  
286 some aspects of a given context [44]. Unlike for example UK Biobank, GS has made a  
287 commitment to oversee and manage overlap in the research goals of applicants. Where it is  
288 clear that two applications would overlap in significant ways leading to a potential  
289 duplication of effort, GS offers to put the researchers in touch with each other and the  
290 “Expert Working Group” (EWG) leads (Figure 1) as appropriate  
291 [<http://www.ed.ac.uk/generation-scotland/about/management/expert-working-groups>].  
292 Academics closely associated with the resource as part of the Expert Working Groups and the  
293 GS Executive Committee (Figure 1) continue to invest their time and intellectual capital in  
294 GS. Some of these academics were involved in the scientific design of the study, the  
295 recruitment of participants and convincing funders of its merit. Moreover, they continue to  
296 be involved in what has been termed ‘articulation work’ [45]. That is to say they (and others)  
297 have sought research funding for a variety of studies via which they have added further data  
298 to the resource, helping to maintain its relevance and scientific importance.  
299 The EWGs include high profile academics whose expertise covers a particular area of  
300 research. Whilst a decision on the part of an applicant not to collaborate with the EWGs does

301 not necessarily create a barrier to access, the EWGs constitute part of a commitment by  
302 GSAC to manage project overlap. A distinctive feature of access arrangements for GS relates  
303 to co-authorship, which is stated in the data and materials transfer agreement and the GS  
304 Authorship & Acknowledgement Policy [9]. GS requires that collaboration with a research  
305 group requesting access leads to shared authorship of research publications resulting from use  
306 of the GS resource. Whilst there are few sanctions that GS can apply to ensure compliance  
307 with this requirement for attribution of credit, there is just one example of these terms not  
308 being honoured from over 150 completed research projects with more than 100 published  
309 research papers. Principle 7 of the RCUK Concordat recognises the costs to research teams  
310 involved in data sharing, emphasising the importance of finding appropriate ways of  
311 acknowledging and rewarding those who collect and manage the data [33].

312 Requests for access to data only or data plus samples are submitted via a secure online portal,  
313 where researchers will also indicate whether linkage to NHS records or participant re-contact  
314 will be necessary. Four areas of evaluation (scientific, governance, data and materials) are  
315 then completed by designated GSAC members. The scientific assessment addresses questions  
316 around the methods and scientific contribution of the proposal. The governance assessment  
317 will often attempt to balance ethical considerations such as confidentiality guarantees and  
318 existing participant consents with details of the requested access to the resource and  
319 participants. Issues such as whether the participants will need to be re-contacted and on what  
320 basis are dealt with here. On one occasion, a proposal was declined as it asked for specific  
321 phenotypic information which was thought likely to raise sensitivities such as participants  
322 feeling that they had been “singled out”. The data assessment is usually done by a member of  
323 the GS management group who also sits on the GSAC. This will consider the data holdings  
324 of GS in respect of the type of data requested, flagging up practical issues relating to release  
325 of data including the relevant participant consent for linkage of their GS data and medical

326 records via the CHI number for re-contact, or sharing samples outside the UK. For example,  
327 if an applicant has requested the samples to be sent overseas or has asked to re-contact  
328 participants, the data assessment will include a report on the number of individuals who have  
329 consented to this. On another occasion a proposal requested unusually specific data relating  
330 to only a small number of individuals and was returned with a request for an overhaul of the  
331 research design, on the grounds that it could pose a potential re-identification risk. The  
332 materials assessment is carried out when samples as well as data are requested. This  
333 assessment must consider whether the proposed research is an appropriate use of the physical  
334 samples, which are a finite resource. Projects looking simultaneously at multiple biomarkers  
335 in a high proportion of the cohort are preferred to those which measure only one biomarker in  
336 a small subset, as this creates more new data for the quantity of sample used. The proposal  
337 form also includes sections on why the GS resource was chosen to carry out the research and  
338 what benefits could be expected to accrue to GS as a result of providing access. How to  
339 ensure appropriate recognition of work done in creating and maintaining the biobank in  
340 regard to each proposal is also a question that is raised depending on the type and extent of  
341 access sought [8]. Discussions during the GSAC meetings are in most cases attempts to  
342 accommodate these various aspects of the proposal. Issues can be and often are resolved by  
343 asking applicants for further information or modification of the type and scope of access  
344 sought in line with the concerns raised in the assessments, which are then discussed in the  
345 GSAC meetings.

#### 346 **Access and sustainability**

347 GS access arrangements and the discussion conducted as part of the GSAC meetings aim to  
348 strike a balance that promotes the sustainability of the resource whilst making it a  
349 ‘community resource’ [24]. One of the recommendations made by the EAGDA [32] is that  
350 repositories should be well-resourced, presumably to support the sort of activities that

351 comprise the managed access approach undertaken by GS. Following the end of the period of  
352 funding from the Scottish Government, the GS project manager and administrator posts have  
353 been underwritten by a mixture of cost recovery charges for access and financial support  
354 from an NHS Research & Development fund. A number of different routes have been found  
355 by academics and staff associated with GS to ensure the continued existence of the GS  
356 repository. Cost recovery through access fees payable by researchers wishing to access the  
357 GS resource is a key part of sustainability. Different tiers of pricing are in place for access to  
358 data and samples by academic and commercial applicants. As cost recovery via access fees is  
359 an important component in the sustainability of the study, it has been necessary to strike a  
360 balance between meeting the real overhead costs of maintaining GS and keeping charges at  
361 non-prohibitive levels. A more steady source of income would undoubtedly lead to a  
362 recalibration of current arrangements, which lend another layer to the decision making  
363 process around allowing access. Cost recovery in order to maintain the lean institutional  
364 structure necessary to the governance and curation of the GS resource is another incentive to  
365 facilitate access, mitigating against any possible tendency towards withholding data [46]. At  
366 the time of writing, only four projects have not gone ahead due to an unwillingness by  
367 prospective secondary users to pay an access charge.

368 Sustainability questions also arise in relation to the wider data sharing environment and the  
369 existence of cost free alternatives to accessing genotype and phenotype data [19] broadly  
370 similar to that in GS. For example, access can be sought to resources via routine academic  
371 collaboration with the Principal Investigator of different cohorts, or from genomics data  
372 resources such as the EGA [30]. Another evolving aspect of the data environment impacting  
373 upon the GS biobank is requests for data to be released so that it can be housed on platforms  
374 elsewhere. This would diminish the position of GSAC as a single gatekeeper of the data. A

375 current example can be seen in the collation and sharing of cohort data via the MRC  
376 Dementias Platform UK (<http://www.dementiasplatform.uk/>).

377 The move in human genomics research towards collaborative working in very large  
378 international consortia, as exemplified by the Cohorts for Heart and Aging Research in  
379 Genomic Epidemiology (CHARGE) Consortium (<http://www.chargeconsortium.com/>) raises  
380 further challenges. GS is one of the cohorts contributing data to CHARGE (and many other  
381 national and international genomics consortia). These consortia facilitate genome-wide  
382 association study meta-analyses and replication opportunities among multiple large and well-  
383 phenotyped longitudinal cohort studies. Data from GS contributes towards greater statistical  
384 power for new discoveries to be made and leads to co-authorship of members of the GS  
385 Executive on the resulting research papers. However, because data and summary statistics  
386 from a large number of cohorts are combined in a meta-analysis, there is a considerable  
387 distance between the details and nuances of the governance of each individual cohort and the  
388 data analytical research activities, such as producing summary statistics, within the  
389 consortium. For example, data analysts working in a consortium will usually not have been  
390 involved in the data access application made to each repository. This disconnect is evidenced  
391 by the resulting research papers often being co-authored by hundreds of researchers, with the  
392 description of each cohort usually confined to the online supplementary information. Means  
393 to attribute credit for the role played by repositories such as GS are themselves not  
394 standardised. This can be of real importance in those cases where researchers have invested  
395 significant time in working on the creation and maintenance of the repository and have  
396 developed a relationship with the study participants [8],[16]. This trend raises questions of  
397 how to incorporate the specifics of local practices, which respond to both sustainability issues  
398 and the expectations of research subjects within these large multi-repository, multi-  
399 institutional arrangements.



## 400 **Managing access to an evolving resource**

401 One of the problems of attempting to produce enduring standardised access procedures is that  
402 unlike data access committees, written protocols cannot respond to relevant developments  
403 both within and outside of individual biobanks. In the decade since GS began recruitment  
404 there have been changes both in the wider data sharing environment and in the composition  
405 of the repository itself. Written consent was sought and gathered during the original GS  
406 recruitment phase (from 2006) for study data to be linked to the NHS health records of  
407 participants, using their CHI number. This identifying number is used for all NHS Scotland  
408 procedures (registrations, attendances, samples, prescribing and investigations) and allows  
409 healthcare records for individuals to be linked across time and location [20]. Ethical approval  
410 for the record linkage was obtained (as part of the GS:SFHS Research Tissue Bank Approval)  
411 from the East of Scotland Research Ethics Committee. In each record linkage project,  
412 permissions were obtained by researchers from the NHS Privacy Advisory Committee or its  
413 successor, the Public Benefit and Privacy Panel for Health and Social Care, for use of NHS  
414 medical data. The number of events, and measurements recorded, increase over time as the  
415 participants get older, which means there is an enormous additional pool of research relevant  
416 data about GS participants obtained *since* recruitment. Although initial data collection was  
417 cross-sectional, GS became a prospective cohort as a result of the ability to link to routine  
418 NHS data [47]. This makes the GS resource valuable for a new generation of researchers with  
419 evolving methodical and technological tools. In large part due to the existence of the Scottish  
420 CHI number and participant consent, GS is able to link to NHS records, wherein the scale of  
421 the data is vast. For example, in the biochemistry dataset alone, there are more than two  
422 million test results for over 800 measures relating to 11,000 GS participants in NHS Tayside,  
423 going back over 25 years. In a recent genomics research project using the GS resource,  
424 outputs from just over two thousand participants for one of these biochemical measures, uric

425 acid, were tested for association with over 24 million genetic markers in a genome-wide  
426 association study (GWAS) [48]. Such research, employing new techniques including  
427 genotype data imputation, continues to augment the number of data items held on individual  
428 study participants within the repository<sup>i</sup>.

### 429 **GS and Evolving Participant Consent**

430 As noted, one of the standard tools for ensuring data access remains ethical in the face of  
431 such dynamic developments is the use of informed consent. It was acknowledged from the  
432 outset that it would be difficult to predict the precise nature of use of the GS resource in the  
433 future. For that reason, and due to the logistics and potential confidentiality challenges of  
434 contacting and re-consenting individual participants for each use, broad consent was sought  
435 from participants. This was intended to permit a very wide range of potential biomedical  
436 research (including commercial) uses<sup>ii</sup>. These documents have been subject to minor updates  
437 to reflect changes in the project. The latest versions (from early 2010) contain information  
438 relating to access to the resource and the management and protection of participant data. It is  
439 made clear that “Any access will be subject to the strictest ethical scrutiny and scientific  
440 rigour’ (GS PIL 2010). Generation Scotland participants originally consented to their data  
441 being made available to researchers from any sector worldwide. However, this original  
442 consent did not specifically allow samples to leave the UK, so additional consent for samples  
443 to be sent abroad was later obtained for a little under half the cohort (Table 1).

444

| <b>Dataset</b>                                             | <b>Date in GS</b> | <b>Participant Numbers</b> |
|------------------------------------------------------------|-------------------|----------------------------|
| Participants recruited                                     | 2006-2011         | 24,084                     |
| Participants with consent and mechanism for record linkage | 2006-2011         | 22,014                     |
| Participants with consent and mechanism for recontact      | 2006-2011         | 21,992*                    |
| Participants with consent for sample transfer ex-UK        | 2012-2013         | 11,255                     |
| Participants with consent for recontact by email           | 2016              | 6,546                      |

445 \*This figure includes 785 participants known to have died since participation in GS

446 Table 1. Summary of consents in the GS resource at baseline (2006 – 2011) and added  
447 subsequent to the end of participant recruitment in 2011  
448  
449 This additional consent was achieved via a re-contact exercise carried out in 2012-3 in  
450 response to several requests to allow the materials and data to be analysed using technologies  
451 only available in other countries. Re-contact for consent, as with all re-contact with study  
452 participants, was done through an established mechanism that, again, used the CHI number,  
453 with letters sent by post by an NHS intermediary for confidentiality. GS saw this as the most  
454 appropriate means to ensure scientifically and ethically valid research was not declined on the  
455 basis of the location of the laboratories. The additional consent process required a submission  
456 to a Research Ethics Committee and took well over a year from initiation to conclusion. It  
457 came at a considerable cost in terms of GS staff time and the non-negligible cost of postage  
458 to and from 21,207 individuals (88% of the 24,084 people in the study database, excluding  
459 participants who had died or who had not given consent for re-contact). Just over half this  
460 number replied with 11,255 participants giving consent for their samples to leave the UK  
461 (53% of people contacted in total). The decision to re-consent was a response to unforeseen  
462 changes in the scientific environment and clearly illustrates the reality of the challenges to  
463 relying upon consent as a unique means of ensuring that changing access practices are  
464 rendered ethical [28]. Although policy makers dealing with the protection of health data are  
465 taking an increasingly permissive view about the relationship between consent and access to  
466 medical records [35], GS continues to employ a consent based approach for use of these data.  
467 The joint report from the UK National Data Guardian was clear on the responsibility of  
468 organisations using NHS data to ensure not only appropriate consent but also anonymity of  
469 disseminated data [34]. Due to the detailed and potentially identifiable nature of the data  
470 collected in GS, it was agreed from the outset that the data would be released using a

471 managed access policy [9]. From a technical point of view the duty to protect participant data  
472 from identification is dealt with by GS via IT and access arrangements. GS study  
473 participants' information is protected by personal identifiers being held separately from all  
474 other study data, using an encrypted version of the CHI number. The encryption key is held  
475 within the NHS IT network and cannot be directly accessed by GS. Researchers as part of  
476 their host institution have to sign a Data User Agreement before they are allowed to access  
477 NHS-linked data. Linked eHealth data is released for clinical academic research via NHS  
478 approved safe havens, or held in a secure network environment [49]. Samples are stored in  
479 four separate laboratories in Scottish University Medical Schools, catalogued through a  
480 central laboratory information management system [50]. Only the GS management team  
481 holds the key between the sample identifiers and the phenotype data. These measures are  
482 designed to ensure that GS samples, which include DNA, blood, serum and urine, are not  
483 accessed without the appropriate authorisation via the access processes detailed above.

484

## 485 **Discussion**

486 One of the issues highlighted in the paper is the interaction between specific local  
487 characteristics of a given biobank or repository, especially in relation to governance and  
488 sustainability, and the guidelines and ideals pervading the wider data sharing and science  
489 policy and ethics environment, which aim at harmonisation and fewer barriers to access [19].  
490 The aim is to show how this policy context translates into the ways in which data is accessed  
491 and ethics and governance are enacted, given factors local to the repository and its practices.  
492 One part of this is the ability to respond to what is non-routine [17]. The GSAC in its  
493 decision-making must consider and accommodate a number of issues, in which it is difficult  
494 to make a clean separation between questions of sustainability, governance and ethics.  
495 GSAC routinely discusses issues relating to the welfare of the data subjects, how further

496 recontacts may be unduly onerous and whether or not a particular request for new data may  
497 make the data subject question their health status. Such questions relate to the continued  
498 goodwill of participants and raise sustainability considerations as do sharing arrangements  
499 which do not adequately recognise the academic and administrative work involved in  
500 providing GS data. Commitment of academics involved with the resource through the EWGs,  
501 the Executive Committee and the GSAC is an important part of ensuring that the governance  
502 model agreed to by participants is maintained.

503 In considering requests for access, GSAC must “ensure the Project, through its  
504 collaborations, conforms to the consent and ethical approval obtained, is not brought into  
505 disrepute and that participant confidentiality is respected” (Generation Scotland Management,  
506 Access and Publications Policy 2016). The work on ethics done by GSAC and the  
507 Management Group is interrogating what is being proposed to ensure continued alignment  
508 between the governance framework, participant expectations, the ability to manage the  
509 resource and strong encouragement from the scientific community to be as open as possible  
510 [32]. The first research proposal was approved by GSAC in 2008 (at a time when participant  
511 recruitment and data collection were ongoing) and the first research findings resulting from  
512 an access request were published in 2010. Nearly a decade after its formation, GSAC remains  
513 actively involved in mediating imperatives to promote access and ethical and sustainable  
514 research and management of the GS resource. We suggest that in addition to the focus upon  
515 ever more universal and standardised practices, the local expertise gained in the management  
516 of such repositories must be nurtured and encouraged [44].

## 517 **Conclusions**

518 In summary, a commitment to open access in genomics research has found almost universal  
519 backing in science and health policy circles in the UK and beyond, but repositories of data  
520 and samples from human subjects may have to operate under managed access, to protect

521 privacy, align with the participant consent and ensure that the resource can be managed in a  
522 responsive and sustainable way. We have used our own engagement with GS in order to  
523 construct an argument about the importance of considering the local aspects to responsively  
524 accommodate access policies designed for universal application. Data access committees  
525 need to be reflexive and flexible, to cope with changing technology and opportunities and  
526 threats from the wider data sharing environment. These considerations are particularly  
527 relevant in relation to closure of a biobank [19],[51] an event that raises practical issues such  
528 as transfer of data or materials to other entities [52]. We have aimed to show that the  
529 responsive ethics work done by GSAC and counterparts in other smaller repositories is key in  
530 mediating between the global and the local [52] in the era of big data and consortium  
531 working. Whilst ever greater emphasis is placed upon open access to data as a commercial  
532 and economic good, some mechanism for incorporating the role now carried out by the  
533 access committee will remain necessary.

#### 534 **Declarations**

#### 535 **Ethics approval and consent to participate**

536 The processes of participant recruitment to GS:SFHS received ethical approval from the NHS  
537 Tayside Committee on Medical Research Ethics (REC Reference Number: 05/S1401/89).  
538 GS:SFHS has subsequently been granted Research Tissue Bank status by the Tayside  
539 Committee on Medical Research Ethics (REC Reference Number: 15/ES/0040), providing  
540 approval for a wide range of uses within medical research, including genetic analyses and  
541 eHealth record linkage.

#### 542 **Consent for publication**

543 Not applicable

#### 544 **Availability of data and material**

545 The data supporting this article are in the public domain.

546 **Competing Interests**

547 The authors declare that they have no competing interests

548 **Funding**

549 CH is funded by the Wellcome Trust project “Making Genomic Medicine” (grant number  
550 100597/2/12/2). The UK Medical Research Council provides core funding to SK as part of  
551 the Quantitative Traits in Health and Disease programme at the MRC Human Genetics Unit,  
552 IGMM, University of Edinburgh. Generation Scotland received core support from the  
553 Scottish Executive Health Department, Chief Scientist Office, grant number CZD/16/6 and  
554 the Scottish Funding Council (HR03006).

555 **Authors’ contributions**

556 Both authors contributed to the writing of the manuscript, in an iterative manner. The text  
557 was drafted by CH and SK, who have each read and approved the final manuscript.

558 **Acknowledgements**

559 We thank David Porteous, Reka Nagy, Shawn Harmon and Gill Haddow for constructive  
560 comments on drafts of the manuscript. We are indebted to the GS Project Manager and GS  
561 Administrator, Archie Campbell and Laura Boekel, for their helpful responses to our requests  
562 for information on details of access requests and issues arising from these.

563 **Figure Legends**

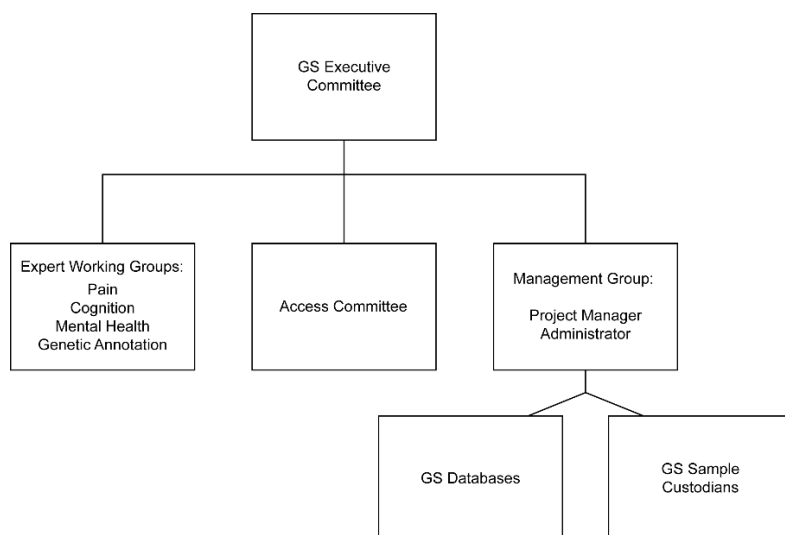

564



565 Figure 1 Generation Scotland (GS) Management Structure

566 **References**

- 567 1. Craig DW, Goor RM, Wang Z, Paschall J, Ostell J, Feolo M, Sherry ST, Manolio TA: **Assessing**  
568 **and managing risk when sharing aggregate genetic variant data.** *Nat Rev Genet* 2011,  
569 **12**:730-736.
- 570 2. Laurie G: **Reflexive governance in biobanking: on the value of policy led approaches and**  
571 **the need to recognise the limits of law.** *Hum Genet* 2011, **130**:347-356.
- 572 3. Haimes E, Williams R: **Sociology, ethics, and the priority of the particular: learning from a**  
573 **case study of genetic deliberations.** *Br J Sociol* 2007, **58**:457-476.
- 574 4. Ives J: 'Encounters with experience': empirical bioethics and the future. *Health Care Anal*  
575 2008, **16**:1-6.
- 576 5. Dunn M, Sheehan M, Hope T, Parker M: **Toward methodological innovation in empirical**  
577 **ethics research.** *Camb Q Healthc Ethics* 2012, **21**:466-480.
- 578 6. Kaye J: **Do we need a uniform regulatory system for biobanks across Europe?** *Eur J Hum*  
579 *Genet* 2006, **14**:245-248.
- 580 7. Ouellette S, Tasse AM: **P(3)G - 10 years of toolbuilding: From the population biobank to the**  
581 **clinic.** *Appl Transl Genom* 2014, **3**:36-40.
- 582 8. Kaye J, Heeney C, Hawkins N, de Vries J, Boddington P: **Data sharing in genomics--re-shaping**  
583 **scientific practice.** *Nat Rev Genet* 2009, **10**:331-335.
- 584 9. [http://www.ed.ac.uk/generation-scotland/using-resources/access-to-resources/access-](http://www.ed.ac.uk/generation-scotland/using-resources/access-to-resources/access-policy)  
585 [policy](http://www.ed.ac.uk/generation-scotland/using-resources/access-to-resources/access-policy): **Generation Scotland.** Accessed 15/03/2017.
- 586 10. Smith BH, Campbell H, Blackwood D, Connell J, Connor M, Deary IJ, Dominiczak AF,  
587 Fitzpatrick B, Ford I, Jackson C, et al: **Generation Scotland: the Scottish Family Health Study;**  
588 **a new resource for researching genes and heritability.** *BMC Med Genet* 2006, **7**:74.
- 589 11. Kaye J GSMC, Heeney C, Smart A, Parker M, (Eds): **Governing Biobanks: Understanding the**  
590 **Interplay Between Law and Practice.** *Hart Oxford* 2012.
- 591 12. Cadigan RJ, Lassiter D, Haldeman K, Conlon I, Reavely E, Henderson GE: **Neglected ethical**  
592 **issues in biobank management: Results from a U.S. study.** *Life Sci Soc Policy* 2013, **9**:1.
- 593 13. Muddyman D, Smee C, Griffin H, Kaye J: **Implementing a successful data-management**  
594 **framework: the UK10K managed access model.** *Genome Med* 2013, **5**:100.
- 595 14. Murtagh MJ, Turner A, Minion JT, Fay M, Burton PR: **International Data Sharing in Practice:**  
596 **New Technologies Meet Old Governance.** *Biopreserv Biobank* 2016, **14**:231-240.
- 597 15. Hanson VL: **Envisioning Ethical Nanotechnology: The Rhetorical Role of Visions in**  
598 **Postponing Societal and Ethical Implications Research.** *Science as Culture* 2011, **20**:1-36.
- 599 16. Heeney C: **An "Ethical Moment" in Data Sharing.** *Sci Technol Human Values* 2017, **42**:3-28.
- 600 17. Parker M: **Ethnography/ethics.** *Social Science & Medicine* 2007, **65**:2248-2259.
- 601 18. Kaye J, Hawkins N: **Data sharing policy design for consortia: challenges for sustainability.**  
602 *Genome Med* 2014, **6**:4.
- 603 19. Chalmers D, Nicol D, Kaye J, Bell J, Campbell AV, Ho CW, Kato K, Minari J, Ho CH, Mitchell C,  
604 et al: **Has the biobank bubble burst? Withstanding the challenges for sustainable**  
605 **biobanking in the digital era.** *BMC Med Ethics* 2016, **17**:39.
- 606 20. Pavis S, Morris AD: **Unleashing the power of administrative health data: the Scottish**  
607 **model.** *Public Health Res Pract* 2015, **25**:e2541541.
- 608 21. Dyke SO, Kirby E, Shabani M, Thorogood A, Kato K, Knoppers BM: **Registered access: a**  
609 **'Triple-A' approach.** *Eur J Hum Genet* 2016, **24**:1676-1680.
- 610 22. Shabani M, Knoppers BM, Borry P: **From the principles of genomic data sharing to the**  
611 **practices of data access committees.** *EMBO Mol Med* 2015, **7**:507-509.
- 612 23. Lowrance W: **Learning from experience: privacy and the secondary use of data in health**  
613 **research. Research report. Nuffield Trust.** *Research report Nuffield Trust* 2002.



- 614 24. **Sharing Data from Large-scale Biological Research Projects: A System of Tripartite**  
615 **Responsibility** [[https://wellcome.ac.uk/sites/default/files/wtd003207\\_0.pdf](https://wellcome.ac.uk/sites/default/files/wtd003207_0.pdf)]
- 616 25. Sheehan M: **Can Broad Consent be Informed Consent?** *Public Health Ethics* 2011, **4**:226-235.
- 617 26. Heeney C, Hawkins N, de Vries J, Boddington P, Kaye J: **Assessing the privacy risks of data**  
618 **sharing in genomics.** *Public Health Genomics* 2011, **14**:17-25.
- 619 27. Cambon-Thomsen A: **Science and society - The social and ethical issues of post-genomic**  
620 **human biobanks.** *Nature Reviews Genetics* 2004, **5**:866-873.
- 621 28. Wallace SE, Gourna EG, Laurie G, Shoush O, Wright J: **Respecting Autonomy Over Time:**  
622 **Policy and Empirical Evidence on Re-Consent in Longitudinal Biomedical Research.**  
623 *Bioethics* 2016, **30**:210-217.
- 624 29. Heeney C and Smart A: **Enacting Governance - The Case of Access.** *Governing Biobanks:*  
625 *Understanding the Interplay between Law and Practice* 2012:232-258.
- 626 30. Lappalainen I, Almeida-King J, Kumanduri V, Senf A, Spalding JD, ur-Rehman S, Saunders G,  
627 Kandasamy J, Caccamo M, Leinonen R, et al: **The European Genome-phenome Archive of**  
628 **human data consented for biomedical research.** *Nat Genet* 2015, **47**:692-695.
- 629 31. Fortin S, Pathmasiri S, Grintuch R, Deschenes M: **'Access arrangements' for biobanks: a fine**  
630 **line between facilitating and hindering collaboration.** *Public Health Genomics* 2011, **14**:104-  
631 114.
- 632 32. <https://wellcome.ac.uk/sites/default/files/governance-of-data-access-eagda-jun15.pdf>:  
633 **Establishing Incentives and Changing Cultures to support Data Access.** 2015.
- 634 33. **Concordat on Open Research Data**  
635 [<http://www.rcuk.ac.uk/documents/documents/concordatonopenresearchdata-pdf/>]
- 636 34. Guardian ND: **Review of Data Security, Consent and Opt-Outs**  
637 [https://www.gov.uk/government/uploads/system/uploads/attachment\\_data/file/535024](https://www.gov.uk/government/uploads/system/uploads/attachment_data/file/535024/data-security-review.PDF)  
638 [/data-security-review.PDF](https://www.gov.uk/government/uploads/system/uploads/attachment_data/file/535024/data-security-review.PDF). 2016.
- 639 35. The Information Governance Review: To Share or Not to Share DoH: 2012.
- 640 36. Erlich Y, Narayanan A: **Routes for breaching and protecting genetic privacy.** *Nat Rev Genet*  
641 2014, **15**:409-421.
- 642 37. Homer N, Szelinger S, Redman M, Duggan D, Tembe W, Muehling J, Pearson JV, Stephan DA,  
643 Nelson SF, Craig DW: **Resolving individuals contributing trace amounts of DNA to highly**  
644 **complex mixtures using high-density SNP genotyping microarrays.** *PLoS Genet* 2008,  
645 **4**:e1000167.
- 646 38. Clayton D: **On inferring presence of an individual in a mixture: a Bayesian approach.**  
647 *Biostatistics* 2010, **11**:661-673.
- 648 39. Savage N: **Privacy: The myth of anonymity.** *Nature* 2016, **537**:S70-72.
- 649 40. Mayrhofer MT, Holub P, Wutte A, Litton JE: **BBMRI-ERIC: the novel gateway to biobanks.**  
650 **From humans to humans.** *Bundesgesundheitsblatt Gesundheitsforschung Gesundheitsschutz*  
651 2016, **59**:379-384.
- 652 41. Wilkinson MD, Dumontier M, Aalbersberg IJ, Appleton G, Axton M, Baak A, Blomberg N,  
653 Boiten JW, da Silva Santos LB, Bourne PE, et al: **The FAIR Guiding Principles for scientific**  
654 **data management and stewardship.** *Sci Data* 2016, **3**:160018.
- 655 42. Knoppers BM: **Framework for responsible sharing of genomic and health-related data.**  
656 *Hugo J* 2014, **8**:3.
- 657 43. Bobrow M: **Funders must encourage scientists to share.** *Nature* 2015, **522**:129.
- 658 44. Timmermans S, Berg M: **Standardization in action: Achieving local universality through**  
659 **medical protocols.** *Social Studies of Science* 1997, **27**:273-305.
- 660 45. Fujimura JH: **Constructing Do-Able Problems in Cancer-Research - Articulating Alignment.**  
661 *Social Studies of Science* 1987, **17**:257-293.
- 662 46. Shabani M, Dyke SO, Joly Y, Borry P: **Controlled Access under Review: Improving the**  
663 **Governance of Genomic Data Access.** *PLoS Biol* 2015, **13**:e1002339.

- 664 47. Smith BH, Campbell A, Linksted P, Fitzpatrick B, Jackson C, Kerr SM, Deary IJ, Macintyre DJ,  
665 Campbell H, McGilchrist M, et al: **Cohort Profile: Generation Scotland: Scottish Family**  
666 **Health Study (GS:SFHS). The study, its participants and their potential for genetic research**  
667 **on health and illness.** *Int J Epidemiol* 2013, **42**:689-700.
- 668 48. Nagy R, Boutin TS, Marten J, Huffman JE, Kerr SM, Campbell A, Evenden L, Gibson J, Amador  
669 C, Howard DM, et al: **Exploration of haplotype research consortium imputation for**  
670 **genome-wide association studies in 20,032 Generation Scotland participants.** *Genome Med*  
671 2017, **9**:23.
- 672 49. Lea NC, Nicholls J, Dobbs C, Sethi N, Cunningham J, Ainsworth J, Heaven M, Peacock T,  
673 Peacock A, Jones K, et al: **Data Safe Havens and Trust: Toward a Common Understanding of**  
674 **Trusted Research Platforms for Governing Secure and Ethical Health Research.** *JMIR Med*  
675 *Inform* 2016, **4**:e22.
- 676 50. Macleod AK, Liewald DC, McGilchrist MM, Morris AD, Kerr SM, Porteous DJ: **Some principles**  
677 **and practices of genetic biobanking studies.** *Eur Respir J* 2009, **33**:419-425.
- 678 51. Stephens N, Dimond R: **Closure of a human tissue biobank: individual, institutional, and**  
679 **field expectations during cycles of promise and disappointment.** *New Genet Soc* 2015,  
680 **34**:417-436.
- 681 52. Zawati MH, Borry P, Howard HC: **Closure of population biobanks and direct-to-consumer**  
682 **genetic testing companies.** *Hum Genet* 2011, **130**:425-432.
- 683

i

|                                                  |           |                                                  |
|--------------------------------------------------|-----------|--------------------------------------------------|
| Baseline Phenotype (GS clinic visit)             | 2006-2011 | 3,228,900 (21,526 x 150)                         |
| Baseline Phenotype (GS Pre-Clinic Questionnaire) | 2006-2011 | 9,439,200 (23,598 x 400)                         |
| Genotype (genome-wide, after QC and imputation)  | 2013-2016 | 24,111,857 imputed genetic variants (20,032 IDs) |
| NHS EHR phenotype (biochemistry tests)           | 2014-2015 | 2,192,346 (11,125 IDs)                           |
| NHS EHR phenotype (hospital in-patient episodes) | 2012-2015 | 106,492 (18,687 IDs)                             |

<sup>ii</sup> Examples of consent forms and Participant Information Leaflets can be viewed on the GS website ([www.generationscotland.org](http://www.generationscotland.org)).
